# Supplementary material
Source: publisher figshare collection journal article supplement (https://sage.figshare.com/ndownloader/files/22849658)
Supplement: Supplementary file 1 [file 22849658]

## SAGE AUTHORSHIP CHANGE REQUEST

### INSTRUCTIONS:

Please complete all sections of this form. We require that **all** authors (including current co-authors, those to be added and those to be removed) sign the relevant sections below. We require all signatures on the same copy of the form. Once complete, please email the form back to the sender.

### SECTION ONE: PAPER INFORMATION

|                                                                                                                                                    |                                           |              |
|----------------------------------------------------------------------------------------------------------------------------------------------------|-------------------------------------------|--------------|
| JOURNAL NAME                                                                                                                                       | JOURNAL OF INTERNATIONAL MEDICAL RESEARCH |              |
| PAPER TITLE                                                                                                                                        | MANUSCRIPT ID NUMBER                      |              |
| The <i>Astragalus polysaccharides</i> Protects the Renal Function and Impacts the TGF- $\beta$ /Smad Signaling Pathway of STZ-induced Diabetic Rat |                                           | JIMR-19-1081 |

### SECTION TWO: ESSENTIAL CONDITIONS FOR CHANGE

The new author list should contain only those who can legitimately claim authorship. This is all those who:

- 1) Have made a substantial contribution to the concept or design of the article; or the acquisition, analysis, or interpretation of data for the article; AND
- 2) Drafted the article or revised it critically for important intellectual content; AND
- 3) Approved the version to be published; AND
- 4) Agreed to be accountable for all aspects of the work in ensuring that questions related to the accuracy or integrity of any part of the work are appropriately investigated and resolved.

NB: Registered authors should meet the conditions of all of the points above. All contributors who do not meet the criteria for authorship should instead be listed in an 'Acknowledgements' section.

### SECTION THREE: REASON FOR AUTHORSHIP CHANGE

|                                                                                                                                                                                                                                                      |
|------------------------------------------------------------------------------------------------------------------------------------------------------------------------------------------------------------------------------------------------------|
| Please provide a detailed explanation for the change in authors in the box below.                                                                                                                                                                    |
| Due to their great contribution of this manuscript, we would like to add Xue Meng, Mingmin Wei, Dong Wang, Xiaohan Qu, Kun Zhang, Nan Zhang and Xinjian Li as the authors. Deleted the current authors Fang Bao, Jiaping Li, Binsheng Lan, Jian Liu. |
| So the new author information is: Xue Meng, Mingmin Wei, Dong Wang, Xiaohan Qu, Kun Zhang, Nan Zhang, Xinjian Li*<br>Department of Nephrology, Affiliated Hospital of Jining Medical University                                                      |
| All authors have known and approved the change of authorships.                                                                                                                                                                                       |

We agree to the proposed change of authorship to the above paper. NB: all authors (added and removed) must sign below.

List of existing and proposed new authors to sign. Please sign, indicating your agreement to the proposed change and order. The individuals listed below will each be credited as authors in the published paper. (Please ask if additional rows are required.)

[illegible]

**DECLARATION:** All the below listed authors agree that they cannot claim authorship to the submitted paper as they do not (or no longer) meet the criteria of the points listed in SECTION TWO.

List of removed authors. Please sign, indicating your agreement to be removed from the list of registered authors. The individuals listed below will not be credited as authors in the published paper. (Please ask if additional rows are required.)

[illegible]
